# Supplementary material for: Heat shock and HSP70 regulate 5-FU-mediated caspase-1 activation in myeloid-derived suppressor cells and tumor growth in mice
Source: PubMed Central journal article supplement — J Immunother Cancer. 2020 May 7;8(1):e000478. doi: 10.1136/jitc-2019-000478 (PMC7228666; doi:10.1136/jitc-2019-000478), 2020-05-07
Supplement: jitc-2019-000478supp001.pdf [file jitc-2019-000478supp001.pdf]

## Supplementary Figure 1

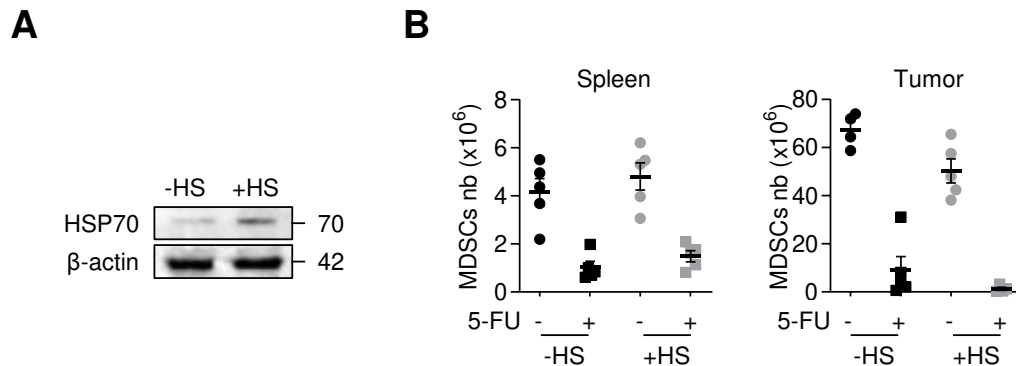

### Supplementary Figure 1: HS effects on HSP70 expression and MDSCs number in C57BL/6 mice spleens and tumors.

(**A**) HSP70 expression was detected in cellular extracts of spleen from C57BL/6 mice heated or not on a pad (42°C, 1h).  $\beta$ -actin was used as a loading. Numbers indicate molecular weights in kDa. (**B**) Spleens and tumors from tumor bearing C57BL/6 mice heated or not on a pad (42°C, 1h) and treated or not with 5-FU (50mg/kg, i.p.) were harvested after 48 hours, dissociated, stained with CD11b, Ly6C and Ly6G antibodies and analyzed by flow cytometry. The total number of MDSCs in all the spleen and the tumor was evaluated.

## Supplementary Figure 2

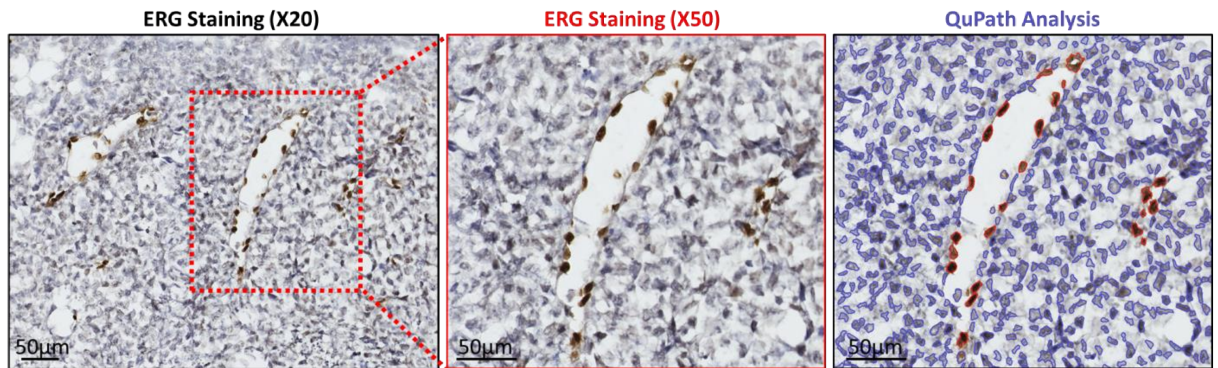

**Supplementary Figure 2:** Representative images of IHC ERG staining of mice tumors.

## Supplementary Figure 3

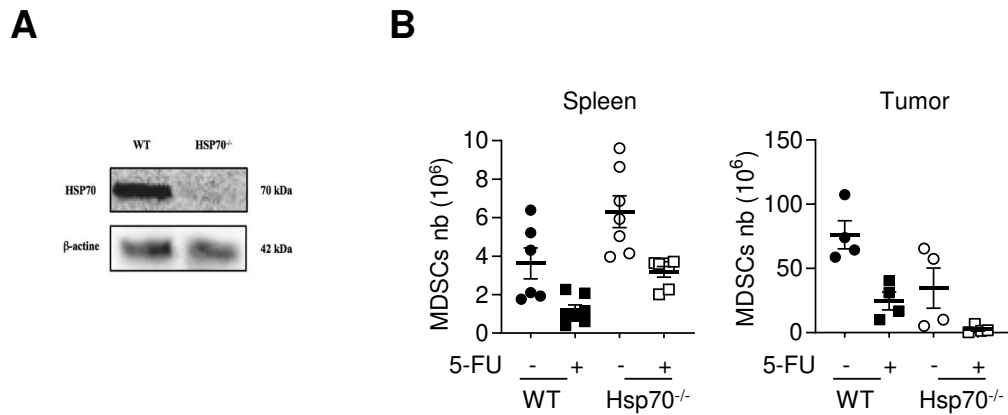

**Supplementary Figure 3: HSP70 deficiency effects on HSP70 expression and MDSCs number in C57BL/6 mice spleens and tumors. (A)** HSP70 expression was detected in cellular extracts of spleen from WT or *Hsp70*<sup>-/-</sup> C57BL/6 mice.  $\beta$ -actin was used as a loading. Numbers indicate molecular weights in kDa. **(B)** Spleens and tumors from tumor bearing WT or *Hsp70*<sup>-/-</sup> C57BL/6 mice treated or not with 5-FU (50mg/kg, i.p.) were harvested, dissociated, stained with CD11b, Ly6C and Ly6G antibodies and analyzed by flow cytometry. The total number of MDSCs in all the spleen was evaluated.

## Supplementary information

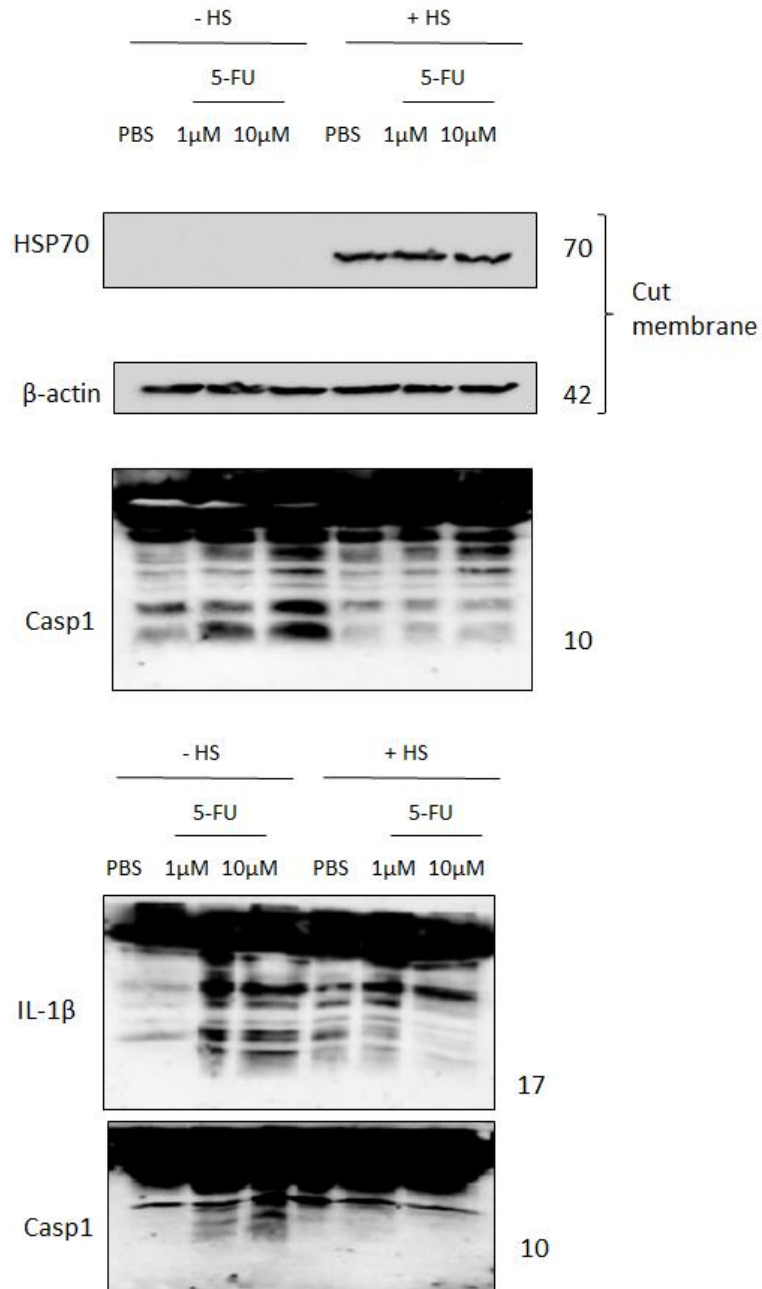

## Supplementary Table 1

|               | Forward              | Reverse               |
|---------------|----------------------|-----------------------|
| <i>Il17a</i>  | TGAGCTTCCCAGATCACAGA | TCCAGAAGGCCCTCAGACTA  |
| <i>Rorc</i>   | GGAAGTCAATGTGGGAGATG | TAGGACGACTTCCATTGCTC  |
| <i>Pecam1</i> | AGTTGCTGCCCATTCATCAC | CTGGTGCTCTATGCAAGCCT  |
| <i>Eng</i>    | ATGCCTGAAGAGTCAGCTCC | GTGTAGCTCAGGCTGCCAAT  |
| <i>Cd3e</i>   | ATGCGGTGGAACACTTTCT  | GTGCTTATCATGCTTCTGAGG |
| <i>Actb</i>   | ATGGAGGGGAATACAGCCC  | TTCTTGCAGCTCCTTCGTT   |
